# Supplementary material for: Association between the baseline tumor size and outcomes of patients with non-small cell lung cancer treated with first-line immune checkpoint inhibitor monotherapy or in combination with chemotherapy
Source: PubMed Central journal article supplement — Transl Lung Cancer Res. 2022 Feb;11(2):135–49. doi: 10.21037/tlcr-21-815 (PMC8902087; doi:10.21037/tlcr-21-815), 2022-02
Supplement: tlcr-11-02-135-dss.pdf [file tlcr-11-02-135-dss.pdf]

## Data Sharing Statement

|                     |                                                                                                                                                     |                                                                                                                  |
|---------------------|-----------------------------------------------------------------------------------------------------------------------------------------------------|------------------------------------------------------------------------------------------------------------------|
| <b>Article Info</b> | <a href="https://dx.doi.org/10.21037/tlcr-21-815">https://dx.doi.org/10.21037/tlcr-21-815</a>                                                       |                                                                                                                  |
| <b>Item</b>         | <b>Question</b>                                                                                                                                     | <b>Authors' Response<br/>(place - if not applicable)</b>                                                         |
| 1                   | Would you like to share data collected for your study to others?                                                                                    | Yes. In order to share data, it must go through the IRB approval process of each site.                           |
| 2                   | If not, would you like to share the reason for your decision?                                                                                       | -                                                                                                                |
| 3                   | What data in particular will be shared?                                                                                                             | Any anonymized information that has been approved by the IRB can be shared.                                      |
| 4                   | Any other documents will be shared? Such as study protocol, statistical analysis plan, informed consent form, clinical study report, analytic code. | No                                                                                                               |
| 5                   | When will data availability begin?                                                                                                                  | When the article is published, Data can be used after approval by the IRB of each participating site.            |
| 6                   | When will data availability end?                                                                                                                    | Data can be used until the period permitted by the IRB of each participating site.                               |
| 7                   | To whom will you share the data?                                                                                                                    | We can share data on research projects that have similar interests to our research.                              |
| 8                   | For what type of analysis or purpose?                                                                                                               | Similar research project.                                                                                        |
| 9                   | How or where can the data/documents be obtained?                                                                                                    | From the corresponding author's email.                                                                           |
| 10                  | Any other restrictions?                                                                                                                             | We may balance the potential benefits and risks for each request and then provide the data that could be shared. |
